# Supplementary material for: Fortification of thermal and structural stability of hemoglobin using choline chloride-based deep eutectic solvents
Source: Royal Society of Chemistry journal article supplement (doi:10.1039/d2cp03407g), 2022-01-01
Supplement: d2cp03407g1.pdf [file d2cp03407g1.pdf]

## Supporting Information

### Fortification of thermal and structural stability of hemoglobin by choline chloride-based deep eutectic solvents.

Harshita Arora<sup>1</sup> §, Diksha Dhiman<sup>1, §</sup>, Krishan Kumar<sup>1,2</sup> and Pannuru Venkatesu<sup>1\*</sup>

<sup>1</sup>Department of Chemistry, University of Delhi, Delhi-110 007, India

<sup>2</sup>Department of Biological Engineering, Inha University, Incheon 22212, Republic of Korea

**This supporting information contains 10 Figures and 2 Tables on 8 pages**

#### Two state unfolding mechanism:

The two-state unfolding mechanism (shown in equation 1) is used for understanding the thermal unfolding of the protein. The native and denatured state of the protein is referred to as folded and unfolded states respectively. Equation 2 is used to find the fraction of unfolded protein.  $Y$ , is referred to as the intensity of protein, which is used to find the fraction of folded ( $f_f$ ) and unfolded ( $f_u$ ) protein at any temperature 'T'. The Experimentally observed intensities of native ( $Y_f$ ) and denaturant ( $Y_u$ ) states are calculated by the extrapolations of the pre- and post-transition base-lines of the thermal denaturation curve using the linear fitting method. Gibbs free energy ( $\Delta_{fu}G$ ) is obtained using equation 5, where  $R$  is the universal gas constant and  $T$  is the absolute temperature. At equilibrium, the  $\Delta_{fu}G$  value is always zero. Thus, the temperature at which this turns out to be zero is said to be the  $T_m$  (transition temperature) for protein. The equilibrium constant ( $K$ ) for the transition is calculated using equation 4.

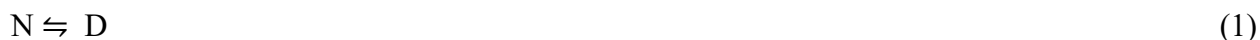

$$f_u = (Y_f - Y) / (Y_f - Y_u) \quad (2)$$

$$f_u + f_f = 1 \quad (3)$$

$$K = f_u / f_f = (Y_f - Y) / (Y - Y_u) \quad (4)$$

$$\Delta_{fu}G = -RT \ln K \quad (5)$$

$$\Delta_{fu}H = T_m \Delta_{fu}S \quad (6)$$

The other thermodynamic parameters at  $T_m$  can be obtained by analysis of the plot of  $\Delta_{fu}G$  versus  $T$ . The slope of this plot at  $T_m$  gives the entropy change of unfolding ( $\Delta_{fu}S$ ). The  $\Delta_{fu}H$  value was calculated using equation 6.  $\Delta C_p$  value was calculated using the Gibbs-Helmholtz equation (equation 7).

$$\Delta_{fu}G(T) = \Delta_{fu}H(T_m) [1 - (T/T_m)] + \Delta C_p [(T - T_m) - T \ln(T/T_m)] \quad (7)$$

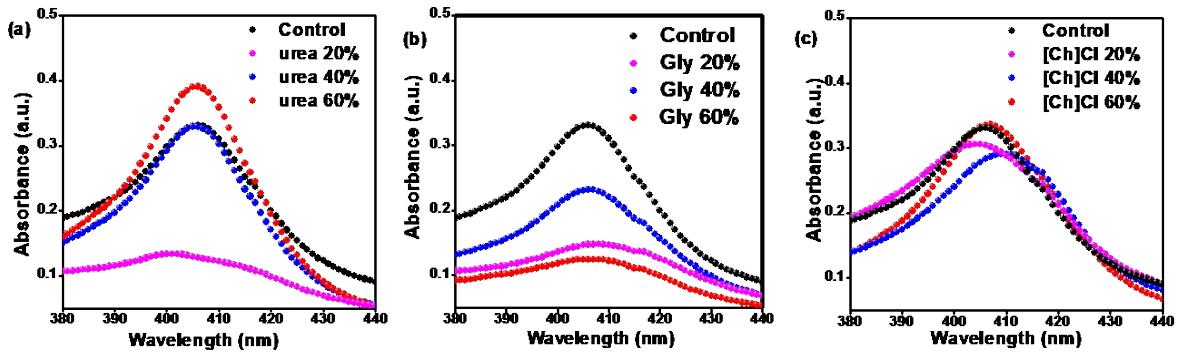

**Figure 1S.** Absorption spectra of Hb in the presence of varying concentrations of (a) urea (b) Gly (c) [Ch]Cl in 10 mM Tris-HCl buffer of pH 7 (Control) at 25 °C.

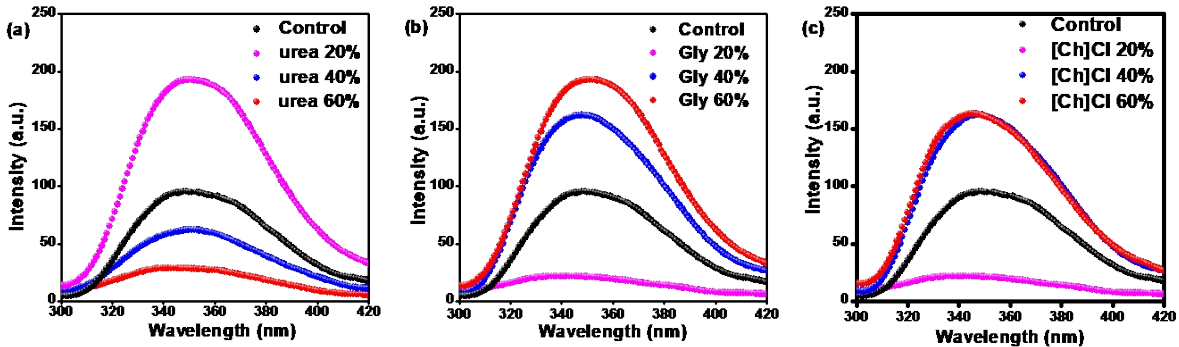

**Figure 2S.** Steady-state fluorescence spectra of Hb in the presence of varying concentrations of (a) urea (b) Gly (c) [Ch]Cl in 10 mM Tris-HCl buffer of pH 7 (Control) at 25 °C.

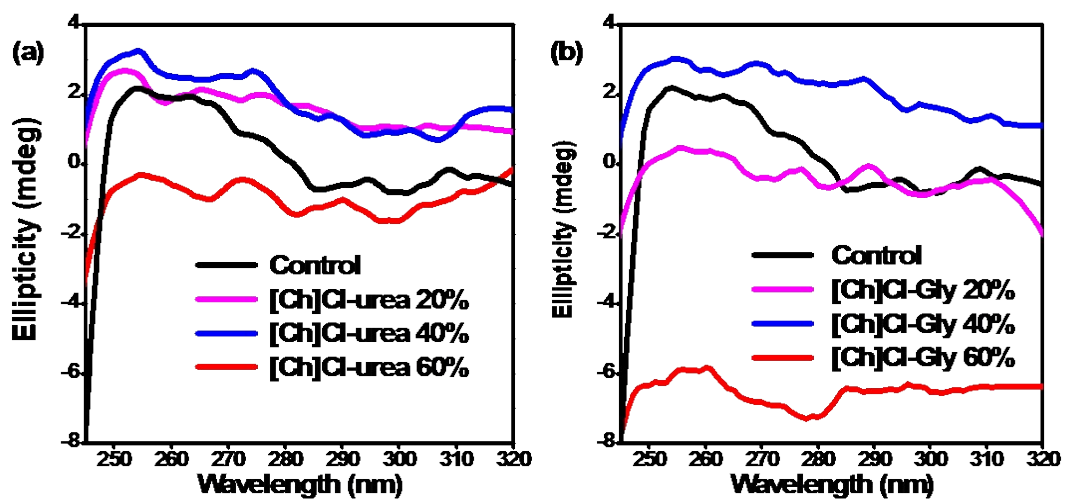

Figure

3S. Near-UV CD spectra of Hb in the presence of varying concentrations of DESs (a) DES 1 and (b) DES 2 in 10 mM Tris-HCl buffer of pH 7 (Control) at 25 °C.

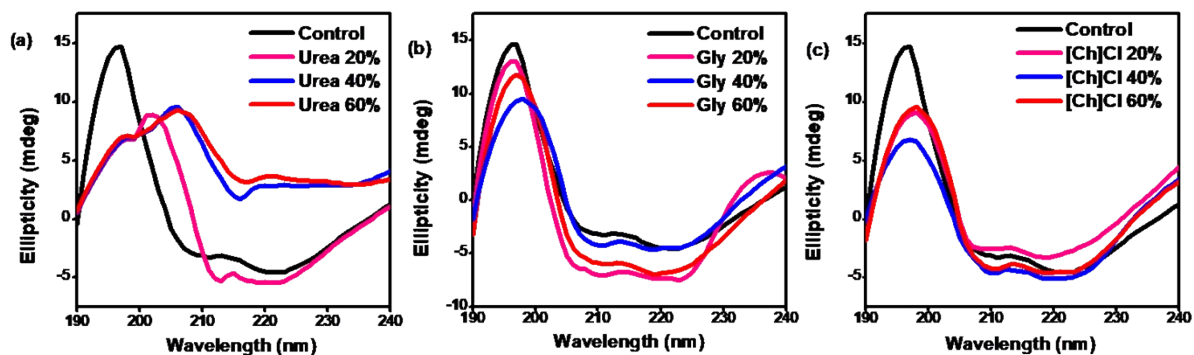

Figure 4S. Far-UV CD spectra of Hb in the presence of varying concentrations of (a) urea (b) Gly (c) [Ch]Cl in 10 mM Tris-HCl buffer of pH 7 (Control) at 25 °C.

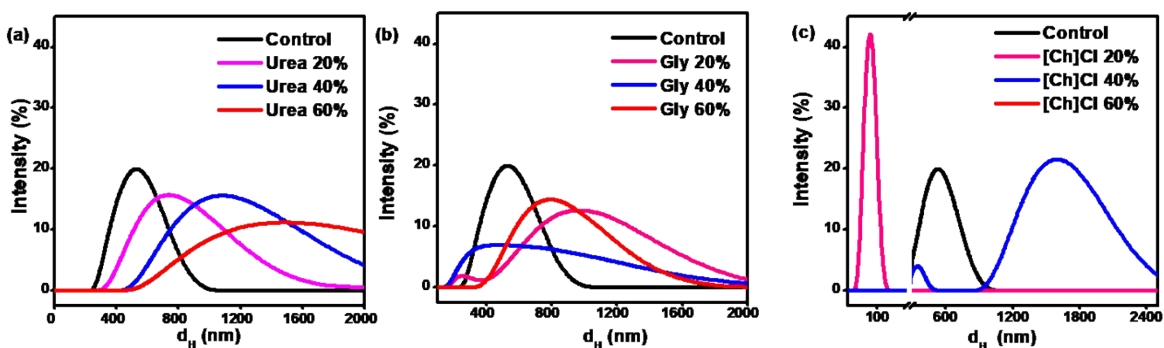

**Figure 5S.** The size ( $d_H$ ) distribution of the light scattered intensity by Hb in the presence of a varying concentration of (a) urea (b) Gly (c) [Ch]Cl in 10 mM Tris-HCl buffer of pH 7 (Control) at 25 °C.

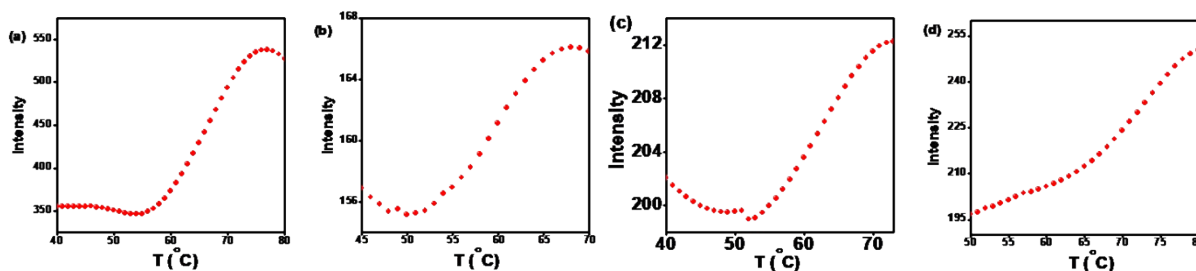

**Figure 6S.** Plot of Intensity versus Temperature ( $T$  (°C)) for Hb in presence of DES 1 at (a) 0 (b) 20 % (c) 40 % and (d) 60 % concentration in the presence of Tris-HCl buffer pH=7.0.

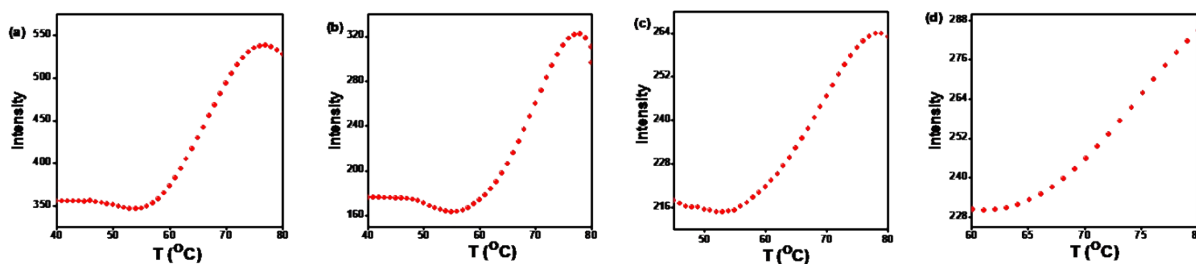

**Figure 7S.** Plot of Intensity versus Temperature ( $T$  (°C)) for Hb in presence of DES 2 at (a) 0 (b) 20 % (c) 40 % and (d) 60 % concentration in the presence of Tris-HCl buffer pH=7.0.

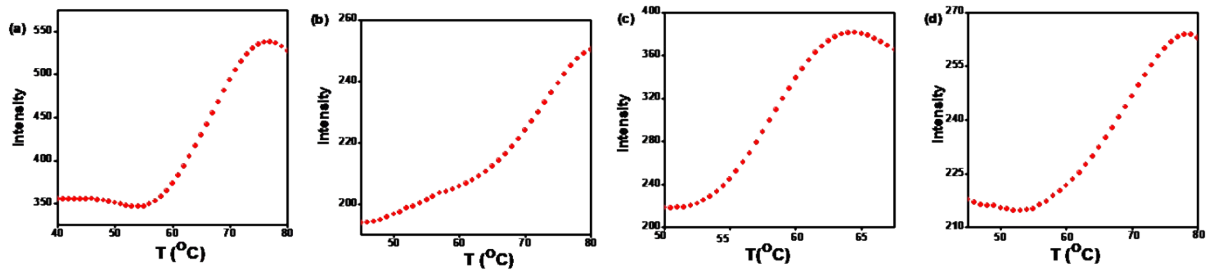

**Figure 8S.** Plot of Intensity versus Temperature (T (°C)) for Hb in presence of [Ch]Cl at (a) 0 (b) 20 % (c) 40 % and (d) 60 % concentration in the presence of Tris-HCl buffer pH=7.0.

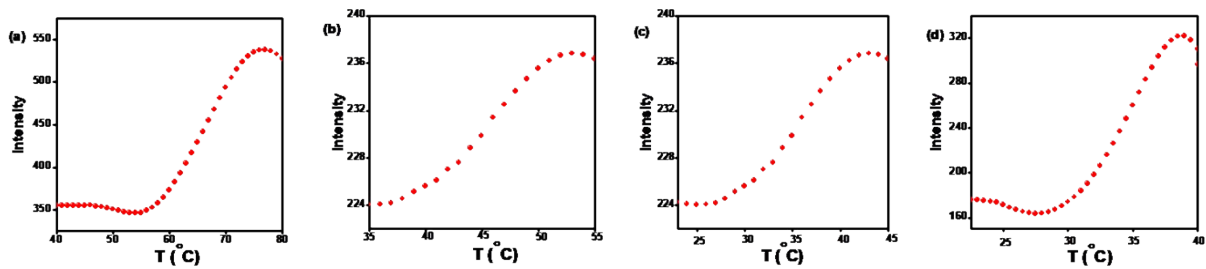

**Figure 9S.** Plot of Intensity versus Temperature (T (°C)) for Hb in presence of urea at (a) 0 (b) 20 % (c) 40 % and (d) 60 % concentration in the presence of Tris-HCl buffer pH=7.0.

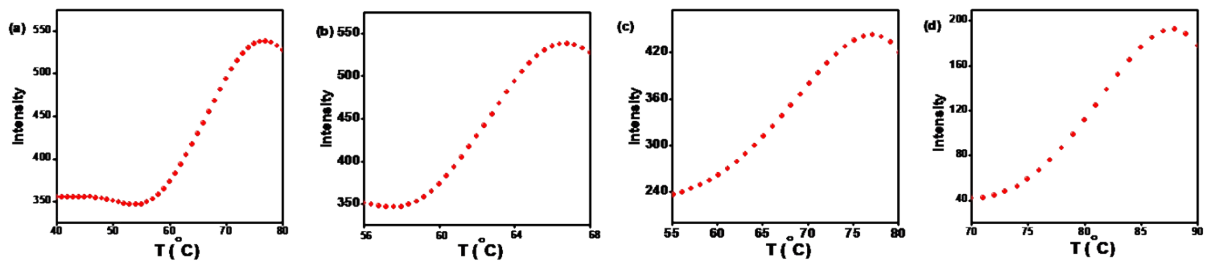

**Figure 10S.** Plot of Intensity versus Temperature (T (°C)) for Hb in presence of Gly at (a) 0 (b) 20 % (c) 40 % and (d) 60 % concentration in the presence of Tris-HCl buffer pH=7.0.

**Table S1.** Fraction secondary structure of Hb in presence of DESs and their components.

| <b>Solvent-System</b> | <b><math>\alpha</math>-Helix</b> | <b><math>\beta</math>-pleated</b> | <b>Random coil</b> | <b>Unordered</b> |
|-----------------------|----------------------------------|-----------------------------------|--------------------|------------------|
| <b>Control</b>        | 0.6                              | 0.12                              | 0.12               | 0.16             |
| <b>DES 1</b>          | 0.62                             | 0.08                              | 0.2                | 0.1              |
| <b>DES 2</b>          | 0.68                             | 0.14                              | 0.1                | 0.08             |
| <b>[Ch]Cl</b>         | 0.62                             | 0.22                              | 0.14               | 0.1              |
| <b>Urea</b>           | 0.52                             | 0.16                              | 0.16               | 0.11             |
| <b>Glycerol</b>       | 0.64                             | 0.11                              | 0.11               | 0.09             |

**Table S2.** Thermodynamic parameters  $T_m$ ,  $\Delta_{fu}G$ ,  $\Delta_{fu}S$ ,  $\Delta_{fu}H$ ,  $\Delta C_p$  of DES 1, DES 2, Urea, Gly, and [Ch]Cl.

| <b>Concentration of DES 1<br/>(% by mass)</b> | <b><math>T_m</math><br/>(°C)</b> | <b><math>\Delta_{fu}G</math><br/>(Kcal/mol)</b> | <b><math>\Delta_{fu}S</math><br/>(Kcal/mol K)</b> | <b><math>\Delta_{fu}H</math><br/>(Kcal/mol)</b> | <b><math>\Delta C_p</math><br/>(Kcal/mol K)</b> |
|-----------------------------------------------|----------------------------------|-------------------------------------------------|---------------------------------------------------|-------------------------------------------------|-------------------------------------------------|
| 0                                             | 67.2±0.2                         | 1.06024                                         | 0.26                                              | 88.4                                            | 3.64089                                         |
| 20%                                           | 64.1±0.7                         | 1.03516                                         | 0.16                                              | 53.92                                           | 2.23841                                         |
| 40%                                           | 67.3±0.7                         | 1.06024                                         | 0.51                                              | 142.8                                           | 5.29776                                         |
| 60%                                           | 72.3±0.4                         | 1.18365                                         | 0.42                                              | 176.07                                          | 5.41702                                         |

| <b>Concentration of DES 2<br/>(% by mass)</b>        | <b>T<sub>m</sub><br/>(°C)</b> | <b>Δ<sub>fu</sub>G<br/>(Kcal/mol)</b> | <b>Δ<sub>fu</sub>S<br/>(Kcal/mol K)</b> | <b>Δ<sub>fu</sub>H<br/>(Kcal/mol)</b> | <b>ΔC<sub>p</sub><br/>(Kcal/mol K)</b> |
|------------------------------------------------------|-------------------------------|---------------------------------------|-----------------------------------------|---------------------------------------|----------------------------------------|
| 0                                                    | 67.2±0.2                      | 1.06024                               | 0.26                                    | 88.4                                  | 3.64089                                |
| 20%                                                  | 69.1±0.4                      | 0.98166                               | 0.45                                    | 153                                   | 6.5969                                 |
| 40%                                                  | 67.3±0.5                      | 1.19184                               | 0.479                                   | 163.8                                 | 6.76149                                |
| 60%                                                  | 77.3±0.8                      | 1.47177                               | 0.558                                   | 195.3                                 | 6.83879                                |
| <b>Concentration of Urea<br/>(% by mass)</b>         | <b>T<sub>m</sub><br/>(°C)</b> | <b>Δ<sub>fu</sub>G<br/>(Kcal/mol)</b> | <b>Δ<sub>fu</sub>S<br/>(Kcal/mol K)</b> | <b>Δ<sub>fu</sub>H<br/>(Kcal/mol)</b> | <b>ΔC<sub>p</sub><br/>(Kcal/mol K)</b> |
| 0                                                    | 67.2±0.2                      | 1.06024                               | 0.26                                    | 88.4                                  | 3.64089                                |
| 20%                                                  | 46.5±0.8                      | 0.93198                               | 0.08                                    | 6.38                                  | 1.5527                                 |
| 40%                                                  | 38.4±0.4                      | 0.20206                               | 0.02                                    | 12.44                                 | 1.05815                                |
| 60%                                                  | 36.3±0.5                      | 0.13232                               | 0.04                                    | 24.7                                  | 0.21025                                |
| <b>Concentration of<br/>Glycerol<br/>(% by mass)</b> | <b>T<sub>m</sub><br/>(°C)</b> | <b>Δ<sub>fu</sub>G<br/>(Kcal/mol)</b> | <b>Δ<sub>fu</sub>S<br/>(Kcal/mol)</b>   | <b>Δ<sub>fu</sub>H<br/>(Kcal/mol)</b> | <b>ΔC<sub>p</sub><br/>(Kcal/mol K)</b> |
| 0                                                    | 67.2±0.2                      | 1.06024                               | 0.26                                    | 88.4                                  | 3.64089                                |
| 20%                                                  | 62.5±0.6                      | 0.91263                               | 0.128                                   | 42.88                                 | 1.19138                                |
| 40%                                                  | 70.4±0.3                      | 1.08842                               | 0.106                                   | 36.358                                | 1.80096                                |
| 60%                                                  | 80.5±0.4                      | 1.32034                               | 0.46                                    | 162.38                                | 7.4696                                 |
| <b>Concentration of [Ch]Cl<br/>(% by mass)</b>       | <b>T<sub>m</sub><br/>(°C)</b> | <b>Δ<sub>fu</sub>G<br/>(Kcal/mol)</b> | <b>Δ<sub>fu</sub>S<br/>(Kcal/mol K)</b> | <b>Δ<sub>fu</sub>H<br/>(Kcal/mol)</b> | <b>ΔC<sub>p</sub><br/>(Kcal/mol K)</b> |
| 0                                                    | 67.2±0.2                      | 1.06024                               | 0.26                                    | 88.4                                  | 3.64089                                |
| 20%                                                  | 67.4±0.4                      | 1.06024                               | 0.198                                   | 67.32                                 | 2.67932                                |
| 40%                                                  | 60.4±0.6                      | 0.19466                               | 0.05                                    | 16.65                                 | 0.81543                                |
| 60%                                                  | 64.5±0.8                      | 0.19912                               | 0.06                                    | 20.22                                 | 0.91134                                |
